# Supplementary material for: Sensory Lexicon and Major Volatiles of Rakı Using Descriptive Analysis and GC-FID/MS
Source: MDPI journal article supplement (doi:10.3390/foods10071494), 2021-06-28
Supplement: s1 [file s1]

Table S1. Results of the descriptive analysis.

| Attributes        | R1   | R2   | R3   | R4  | R5  | R6   | R12 | R13 | R14 | R15 | R16 | R17 | R18 | R19 | R28 | R29 | R30 | R31 | LSD | F   |
|-------------------|------|------|------|-----|-----|------|-----|-----|-----|-----|-----|-----|-----|-----|-----|-----|-----|-----|-----|-----|
| colour            | 13.3 | 11.3 | 13.6 | 9.6 | 9.2 | 12.6 | 8.3 | 9.5 | 8.3 | 7.8 | 8.2 | 7.5 | 7.6 | 7.0 | 7.6 | 4.6 | 5.2 | 7.8 | 1.4 | *** |
| pale-yellow       | 0.0  | 0.0  | 0.0  | 0.4 | 0.0 | 0.0  | 0.0 | 0.0 | 0.0 | 8.1 | 0.0 | 0.0 | 8.4 | 0.0 | 0.0 | 0.0 | 0.0 | 0.0 | 0.6 | *** |
| V-coating         | 12.5 | 9.6  | 12.9 | 8.1 | 7.8 | 11.6 | 7.0 | 8.8 | 6.8 | 7.7 | 6.9 | 6.2 | 7.9 | 5.8 | 6.1 | 3.8 | 4.5 | 6.4 | 1.3 | *** |
| N-alcohol         | 4.6  | 5.4  | 5.2  | 6.0 | 5.4 | 5.1  | 5.6 | 5.6 | 5.7 | 5.3 | 5.3 | 4.8 | 5.3 | 4.8 | 5.5 | 5.1 | 5.2 | 4.7 | 1.1 | ns  |
| N-suma            | 5.0  | 3.9  | 4.8  | 4.5 | 3.9 | 5.5  | 3.2 | 4.0 | 4.2 | 4.9 | 4.4 | 4.2 | 4.2 | 3.2 | 4.0 | 2.6 | 2.6 | 4.0 | 1.2 | *** |
| N-head&taile      | 2.3  | 2.8  | 2.2  | 2.6 | 2.5 | 1.6  | 4.4 | 3.4 | 3.9 | 3.4 | 3.5 | 3.2 | 3.2 | 3.6 | 3.8 | 4.5 | 5.4 | 3.3 | 1.2 | *** |
| N-damp-dry hay    | 1.6  | 2.5  | 1.9  | 2.2 | 2.7 | 1.4  | 4.4 | 3.2 | 3.8 | 3.6 | 3.3 | 2.7 | 2.9 | 2.8 | 3.1 | 4.2 | 3.7 | 2.8 | 1.1 | *** |
| N-fresh grape     | 4.0  | 3.8  | 5.0  | 4.7 | 4.1 | 4.7  | 3.4 | 3.5 | 4.4 | 5.9 | 4.7 | 4.0 | 4.9 | 3.6 | 3.4 | 2.8 | 2.4 | 3.5 | 1.2 | *** |
| N-green apple     | 1.8  | 1.5  | 2.5  | 2.1 | 2.0 | 2.2  | 1.5 | 1.4 | 1.7 | 2.2 | 1.8 | 1.9 | 1.8 | 1.4 | 1.4 | 1.0 | 1.1 | 1.5 | 0.9 | ns  |
| N-fruity          | 4.2  | 4.5  | 4.5  | 4.5 | 4.7 | 4.8  | 3.6 | 3.6 | 4.2 | 4.7 | 4.5 | 4.3 | 4.2 | 3.5 | 3.2 | 2.4 | 3.2 | 4.4 | 1.2 | **  |
| N-raisin          | 5.0  | 4.1  | 2.9  | 3.1 | 3.8 | 3.5  | 3.8 | 3.8 | 3.6 | 2.0 | 2.8 | 2.7 | 2.0 | 2.2 | 2.6 | 2.7 | 2.6 | 3.0 | 1.3 | **  |
| N-dry Fruit       | 4.4  | 3.8  | 3.0  | 3.0 | 3.6 | 3.4  | 3.3 | 3.6 | 3.5 | 2.7 | 2.9 | 2.8 | 2.5 | 2.5 | 2.7 | 3.1 | 2.5 | 3.2 | 1.2 | ns  |
| N-flowery         | 4.3  | 3.6  | 4.2  | 4.6 | 3.5 | 4.4  | 3.0 | 3.4 | 3.2 | 4.1 | 4.1 | 3.8 | 4.6 | 3.5 | 3.2 | 3.0 | 2.2 | 3.6 | 1.3 | *   |
| N-dry flower      | 4.2  | 4.3  | 4.3  | 3.6 | 2.9 | 3.9  | 3.6 | 3.6 | 3.8 | 3.2 | 3.5 | 3.0 | 2.9 | 2.7 | 3.0 | 3.0 | 2.4 | 2.7 | 1.2 | *   |
| N-sweet           | 9.9  | 8.7  | 10.2 | 9.1 | 8.2 | 9.9  | 8.1 | 8.6 | 7.8 | 9.1 | 8.3 | 7.7 | 8.8 | 7.7 | 7.8 | 6.2 | 6.8 | 7.8 | 1.1 | *** |
| N-menthol         | 2.7  | 2.8  | 3.3  | 3.0 | 2.2 | 3.0  | 2.2 | 2.5 | 2.2 | 2.9 | 2.0 | 2.2 | 2.5 | 1.7 | 1.5 | 1.6 | 1.6 | 1.9 | 1.1 | *   |
| N-spicy           | 5.6  | 5.7  | 5.7  | 5.2 | 5.7 | 6.2  | 6.0 | 5.6 | 5.7 | 5.8 | 5.1 | 5.3 | 6.1 | 4.7 | 4.4 | 4.4 | 4.4 | 5.0 | 1.1 | *   |
| N-aniseed         | 10.7 | 9.5  | 10.8 | 8.9 | 8.9 | 9.7  | 7.8 | 9.5 | 8.2 | 9.2 | 8.5 | 8.4 | 8.5 | 8.0 | 7.5 | 7.1 | 6.6 | 8.2 | 1.1 | *** |
| N-roasted aniseed | 0.9  | 0.9  | 0.6  | 0.7 | 0.7 | 2.3  | 0.7 | 0.5 | 1.0 | 0.9 | 0.7 | 0.6 | 0.7 | 0.4 | 1.3 | 0.5 | 0.4 | 0.6 | 1.1 | ns  |
| N-boiled aniseed  | 2.2  | 2.8  | 1.9  | 2.3 | 2.4 | 2.1  | 5.0 | 3.5 | 3.4 | 2.9 | 3.2 | 2.5 | 2.3 | 2.9 | 3.7 | 3.4 | 3.3 | 2.2 | 1.1 | *** |
| N-mastic          | 6.1  | 4.1  | 4.8  | 2.3 | 1.9 | 4.7  | 2.2 | 2.0 | 1.7 | 2.7 | 2.2 | 1.8 | 1.8 | 1.8 | 1.3 | 0.7 | 1.1 | 1.3 | 1.6 | *** |
| N-black pepper    | 2.4  | 2.7  | 3.0  | 2.1 | 2.6 | 3.0  | 2.6 | 2.6 | 2.1 | 2.6 | 2.2 | 2.6 | 2.9 | 1.8 | 2.2 | 1.9 | 1.7 | 1.8 | 1.1 | ns  |
| N-clove           | 1.7  | 1.8  | 2.1  | 1.5 | 1.9 | 1.9  | 1.6 | 1.6 | 1.8 | 1.5 | 1.5 | 1.7 | 1.9 | 1.3 | 1.3 | 1.5 | 1.1 | 1.4 | 0.7 | ns  |
| N-liquorice       | 3.9  | 2.8  | 3.6  | 2.6 | 3.2 | 3.0  | 2.9 | 3.2 | 3.2 | 3.0 | 2.8 | 2.8 | 2.8 | 2.3 | 2.6 | 2.0 | 1.8 | 2.4 | 0.9 | **  |
| N-fennel          | 5.2  | 4.9  | 5.0  | 4.8 | 4.4 | 5.3  | 4.8 | 4.4 | 4.9 | 5.0 | 4.5 | 4.5 | 4.0 | 3.6 | 4.0 | 2.9 | 3.2 | 3.9 | 1.1 | *** |
| N-bitter almond   | 0.8  | 0.8  | 1.3  | 0.6 | 0.5 | 0.5  | 0.7 | 0.6 | 0.8 | 0.6 | 0.6 | 0.6 | 0.5 | 0.4 | 0.6 | 0.3 | 0.3 | 0.4 | 0.5 | ns  |
| N-fresh-resin     | 4.3  | 4.1  | 5.2  | 4.3 | 3.7 | 5.0  | 3.1 | 3.4 | 3.5 | 5.8 | 4.0 | 3.4 | 5.3 | 3.7 | 3.1 | 3.3 | 3.4 | 4.0 | 1.1 | *** |
| N-nutty           | 2.1  | 2.0  | 1.7  | 1.8 | 1.5 | 1.9  | 1.7 | 1.7 | 2.0 | 2.1 | 1.8 | 1.8 | 1.7 | 1.5 | 1.5 | 1.7 | 1.4 | 1.4 | 0.7 | ns  |
| N-woody           | 0.8  | 0.7  | 0.9  | 0.8 | 0.6 | 0.7  | 0.5 | 0.5 | 0.8 | 5.6 | 0.6 | 0.8 | 5.1 | 0.5 | 0.5 | 0.5 | 0.4 | 0.6 | 1.0 | *** |
| P-suma            | 4.5  | 3.9  | 4.8  | 4.3 | 3.6 | 4.8  | 3.1 | 3.7 | 4.4 | 4.2 | 4.4 | 4.0 | 4.2 | 2.6 | 3.1 | 2.6 | 2.4 | 3.1 | 1.0 | *** |
| P-head&tail       | 1.9  | 2.1  | 2.1  | 3.3 | 2.0 | 2.0  | 4.3 | 3.2 | 3.9 | 2.6 | 3.2 | 2.7 | 2.2 | 3.4 | 3.3 | 4.0 | 4.6 | 3.0 | 1.2 | *** |
| P-damp-dry hay    | 1.7  | 1.7  | 1.7  | 2.4 | 1.9 | 2.0  | 4.1 | 3.2 | 3.2 | 2.3 | 2.5 | 2.3 | 2.2 | 2.5 | 3.0 | 3.1 | 2.9 | 2.2 | 1.0 | *** |
| P-fresh grape     | 3.2  | 4.0  | 4.7  | 4.1 | 3.6 | 4.0  | 3.1 | 3.8 | 3.9 | 5.5 | 4.1 | 4.0 | 4.8 | 3.0 | 3.2 | 2.6 | 2.3 | 3.2 | 1.2 | *** |
| P-green apple     | 1.6  | 1.6  | 2.2  | 1.8 | 1.3 | 1.5  | 1.0 | 1.4 | 1.6 | 1.3 | 1.9 | 1.7 | 1.3 | 0.9 | 1.3 | 0.9 | 1.0 | 1.2 | 0.8 | ns  |
| P-fruity          | 4.2  | 4.0  | 4.4  | 4.7 | 3.9 | 4.0  | 3.1 | 3.8 | 3.8 | 4.6 | 4.5 | 4.4 | 3.9 | 3.0 | 3.0 | 2.6 | 2.8 | 3.6 | 1.0 | *** |
| P-raisin          | 5.3  | 3.9  | 2.8  | 3.1 | 3.3 | 3.3  | 3.2 | 3.3 | 3.2 | 2.2 | 2.2 | 2.4 | 1.7 | 1.9 | 2.7 | 2.6 | 1.7 | 2.4 | 1.1 | *** |
| P-dry Fruit       | 4.2  | 3.8  | 2.6  | 2.6 | 3.3 | 2.7  | 3.0 | 3.0 | 3.2 | 2.4 | 2.5 | 2.3 | 2.2 | 1.9 | 2.5 | 2.5 | 1.9 | 2.5 | 1.1 | **  |
| P-flowery         | 3.4  | 3.1  | 4.1  | 3.8 | 2.4 | 3.8  | 2.5 | 3.5 | 2.3 | 3.3 | 3.5 | 3.3 | 3.5 | 2.3 | 2.0 | 2.2 | 1.6 | 2.9 | 1.2 | **  |
| P-dry flower      | 3.8  | 3.6  | 3.2  | 2.3 | 2.7 | 3.5  | 2.6 | 3.4 | 3.0 | 2.9 | 3.0 | 2.1 | 2.6 | 1.8 | 2.9 | 2.1 | 1.8 | 2.3 | 1.1 | **  |
| P-sweet           | 9.2  | 9.0  | 9.6  | 7.8 | 7.8 | 8.7  | 7.0 | 8.4 | 7.8 | 8.6 | 8.5 | 7.7 | 7.9 | 6.3 | 6.4 | 6.0 | 6.1 | 7.1 | 1.1 | *** |
| P-menthol         | 2.6  | 2.6  | 2.8  | 2.6 | 2.0 | 3.1  | 2.2 | 2.7 | 2.0 | 2.6 | 2.1 | 1.9 | 2.2 | 1.5 | 1.7 | 1.5 | 1.6 | 2.0 | 1.1 | *   |
| P-spicy           | 6.0  | 5.6  | 5.4  | 5.3 | 5.0 | 6.3  | 5.8 | 5.4 | 4.9 | 6.1 | 5.3 | 5.1 | 5.9 | 4.0 | 4.4 | 3.9 | 3.6 | 4.4 | 1.2 | *** |
| P-aniseed         | 10.2 | 9.0  | 10.1 | 7.9 | 8.5 | 9.2  | 7.8 | 8.2 | 7.9 | 8.8 | 8.2 | 7.6 | 7.7 | 6.6 | 6.4 | 6.0 | 6.0 | 7.2 | 1.1 | *** |
| P-roasted aniseed | 1.3  | 1.3  | 0.8  | 0.7 | 0.8 | 2.4  | 0.8 | 0.7 | 1.4 | 0.7 | 0.9 | 0.2 | 0.8 | 0.5 | 1.0 | 0.5 | 0.6 | 0.8 | 0.9 | **  |

|                  |      |     |      |     |     |      |     |     |     |     |     |     |     |     |     |     |     |     |     |     |
|------------------|------|-----|------|-----|-----|------|-----|-----|-----|-----|-----|-----|-----|-----|-----|-----|-----|-----|-----|-----|
| P-boiled aniseed | 1.8  | 1.8 | 1.8  | 1.9 | 2.0 | 1.4  | 4.0 | 2.9 | 3.4 | 2.7 | 2.9 | 2.3 | 2.0 | 2.7 | 2.5 | 3.2 | 2.9 | 2.5 | 1.0 | *** |
| P-mastic         | 4.8  | 2.6 | 3.0  | 1.5 | 0.9 | 3.1  | 1.0 | 1.3 | 1.3 | 1.6 | 1.3 | 1.2 | 1.7 | 0.9 | 1.2 | 0.6 | 0.5 | 1.0 | 1.2 | *** |
| P-black pepper   | 2.3  | 3.2 | 2.1  | 2.5 | 2.2 | 3.4  | 2.7 | 2.3 | 1.9 | 2.3 | 1.9 | 2.2 | 3.0 | 1.4 | 2.3 | 2.4 | 1.4 | 1.8 | 1.1 | **  |
| P-clove          | 1.6  | 1.7 | 1.7  | 1.3 | 1.4 | 1.8  | 1.6 | 1.4 | 1.9 | 1.8 | 1.4 | 1.2 | 1.5 | 0.8 | 1.4 | 1.4 | 0.9 | 1.4 | 0.7 | ns  |
| P-liquorice      | 3.1  | 3.4 | 2.9  | 2.4 | 2.5 | 3.0  | 2.2 | 2.9 | 2.6 | 2.9 | 2.6 | 2.8 | 2.5 | 1.9 | 1.9 | 1.5 | 1.2 | 2.0 | 0.9 | *** |
| P-fennel         | 4.5  | 4.3 | 4.5  | 4.0 | 3.9 | 4.1  | 3.9 | 4.3 | 3.9 | 4.3 | 3.8 | 3.9 | 4.0 | 3.1 | 3.3 | 2.7 | 2.4 | 3.3 | 1.0 | *** |
| P-bitter almond  | 1.0  | 0.8 | 0.7  | 0.6 | 0.5 | 0.2  | 0.7 | 0.8 | 0.7 | 0.7 | 0.8 | 0.4 | 0.6 | 0.3 | 0.5 | 0.3 | 0.2 | 0.3 | 0.5 | **  |
| P-fresh-resin    | 4.1  | 3.9 | 3.5  | 3.4 | 3.6 | 4.1  | 3.0 | 2.7 | 3.4 | 5.1 | 3.0 | 3.2 | 4.8 | 2.7 | 2.8 | 2.7 | 2.7 | 3.5 | 1.0 | *** |
| P-nutty          | 1.9  | 2.5 | 1.6  | 1.4 | 1.7 | 1.6  | 1.7 | 1.6 | 1.7 | 2.2 | 1.9 | 1.5 | 1.8 | 1.2 | 1.5 | 1.1 | 1.2 | 1.2 | 0.7 | **  |
| P-woody          | 0.8  | 0.9 | 0.8  | 0.6 | 0.6 | 0.7  | 0.9 | 0.5 | 0.7 | 5.1 | 0.8 | 0.7 | 5.0 | 0.5 | 0.8 | 0.9 | 0.5 | 0.7 | 1.1 | *** |
| tingling-numbing | 4.7  | 4.6 | 4.5  | 6.8 | 4.4 | 4.5  | 4.7 | 5.1 | 5.1 | 4.4 | 4.9 | 4.4 | 5.0 | 3.7 | 5.9 | 5.0 | 5.1 | 4.1 | 1.5 | *   |
| body             | 10.2 | 8.8 | 10.1 | 7.8 | 7.0 | 9.9  | 6.8 | 7.5 | 7.4 | 8.4 | 7.1 | 6.0 | 8.1 | 5.5 | 6.1 | 4.3 | 4.4 | 6.2 | 1.3 | *** |
| burning          | 6.3  | 5.5 | 6.0  | 7.7 | 5.7 | 5.1  | 5.3 | 6.2 | 6.5 | 5.2 | 5.6 | 5.6 | 5.5 | 4.6 | 6.4 | 5.3 | 5.1 | 5.1 | 1.5 | ns  |
| coating/creamy   | 8.5  | 6.7 | 8.6  | 6.3 | 5.7 | 7.7  | 5.8 | 5.7 | 5.5 | 6.9 | 5.6 | 4.9 | 6.5 | 4.5 | 4.9 | 3.9 | 4.2 | 4.9 | 1.2 | *** |
| throat burning   | 6.2  | 6.3 | 6.0  | 7.3 | 6.6 | 5.6  | 6.2 | 6.4 | 6.7 | 6.0 | 5.9 | 6.0 | 5.2 | 5.2 | 6.1 | 5.1 | 4.6 | 5.3 | 1.5 | ns  |
| persistence      | 11.2 | 9.6 | 10.8 | 9.7 | 8.5 | 10.3 | 8.0 | 9.1 | 8.8 | 9.3 | 8.1 | 7.6 | 9.3 | 5.9 | 7.2 | 5.5 | 5.0 | 7.1 | 1.2 | *** |
| bitterness       | 1.8  | 1.9 | 1.9  | 1.2 | 2.0 | 2.4  | 2.2 | 2.4 | 3.1 | 2.0 | 2.2 | 2.1 | 2.2 | 1.6 | 2.5 | 3.2 | 3.2 | 2.0 | 1.1 | *   |
| sweetness        | 7.8  | 7.6 | 8.5  | 7.2 | 7.2 | 7.9  | 7.4 | 6.5 | 7.1 | 7.6 | 7.3 | 6.7 | 7.6 | 6.3 | 6.4 | 6.2 | 6.2 | 6.9 | 1.1 | **  |

F: Significance at which means differ as shown as analysis of variance, \* $p < 0.05$  level, \*\* $p < 0.01$  level, \*\*\* $p < 0.001$  level; ns: not significant; LSD: Least Significant Differences is calculated at 95% confidence level with the interaction as the error terms. If the difference between the means in the same row is greater than the LSD value, the difference is statistically significant. N; Aroma on the nose and P; Aroma in the mouth (retronasal)
